# Supplementary material for: Automated analysis of food-borne pathogens using a novel microbial cell culture, sensing and classification system
Source: Royal Society of Chemistry journal article supplement (doi:10.1039/c5an02614h), 2016-01-01
Supplement: c5an02614h1.pdf [file c5an02614h1.pdf]

## Supplementary information

# Automated Analysis of Food-borne Pathogens using a Novel Microbial Cell Culture, Sensing and Classification System

Kun Xiang<sup>a</sup>, Yinglei Li<sup>b</sup>, William Ford<sup>b</sup>, Walker Land<sup>b</sup>, David Schaffer<sup>b</sup>, Robert  
Congdon<sup>a</sup>, Omowunmi Sadik<sup>a\*</sup>

<sup>a</sup>Center for Advanced Sensors & Environmental Systems (CASE)  
Department of Chemistry  
State University of New York at Binghamton  
P.O Box 6000  
Binghamton, NY, 13902

<sup>b</sup>Department of Biomedical Engineering,  
State University of New York at Binghamton  
P.O Box 6000  
Binghamton, NY, 13902

\* Corresponding author: [osadik@binghamton.edu](mailto:osadik@binghamton.edu)

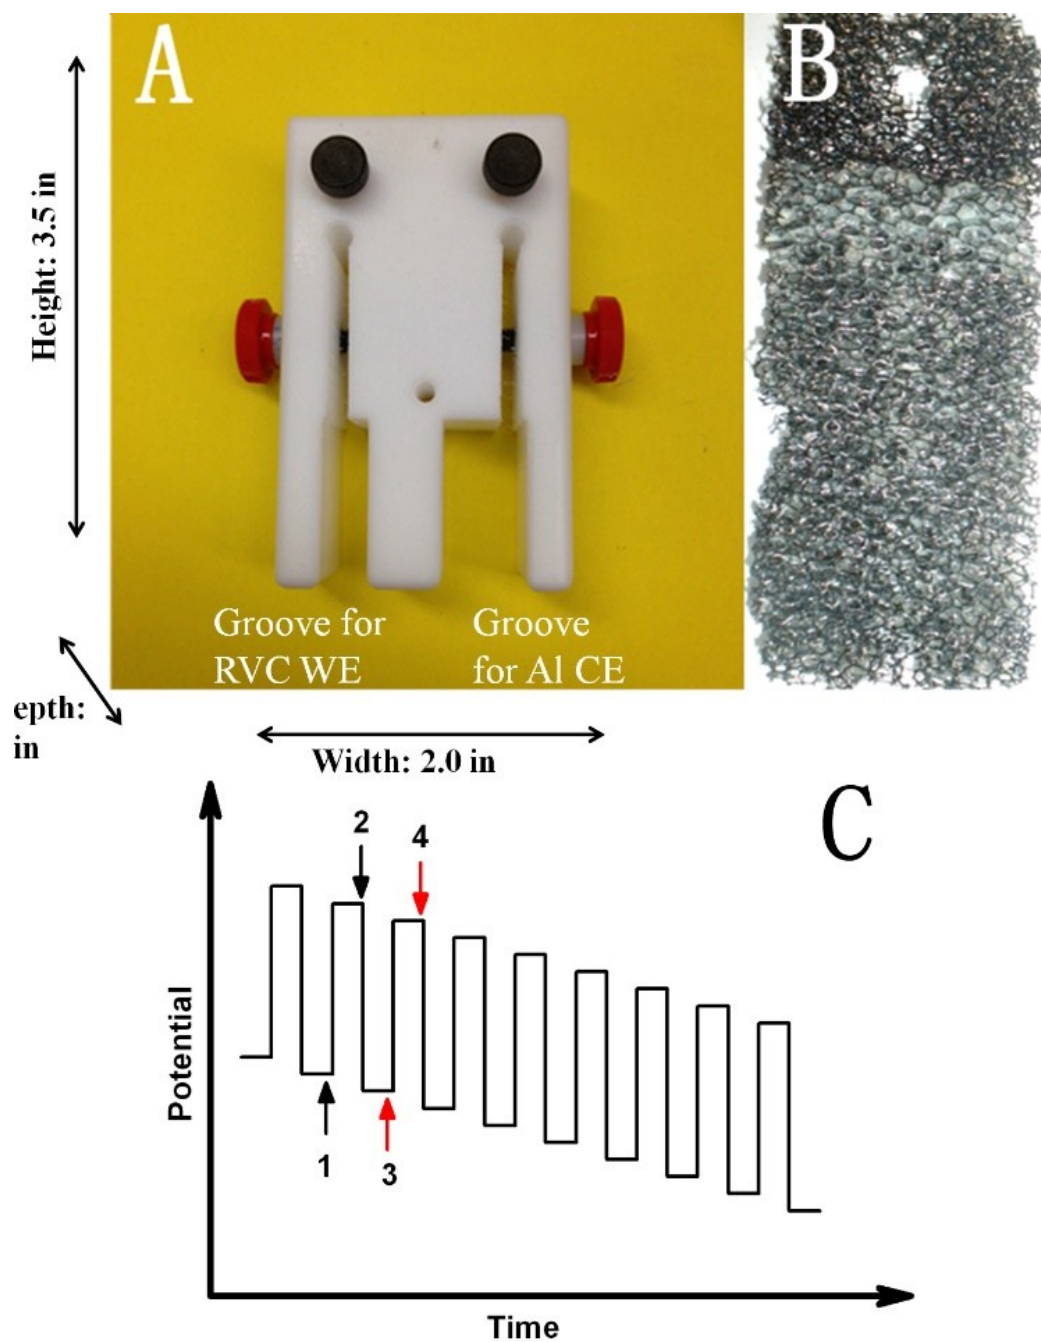

**Figure S-1.** (A) Sensor platform designs, reticulated vitreous carbons (RVC) applied as working electrodes, Aluminum forms served as counter electrodes. (B) Working electrode, RVC, with biofilm adhered. (C) Applied potential in DPV: the upside arrows indicate the voltages prior to the pulse. The downside arrows indicate the voltages after the pulse. Different colors indicate different pairs. 0.022 V is the voltage difference between 1 & 2 and, 3 & 4 respectively; 0.002 V is the voltage difference between 1 & 3 and 2 & 4 respectively.

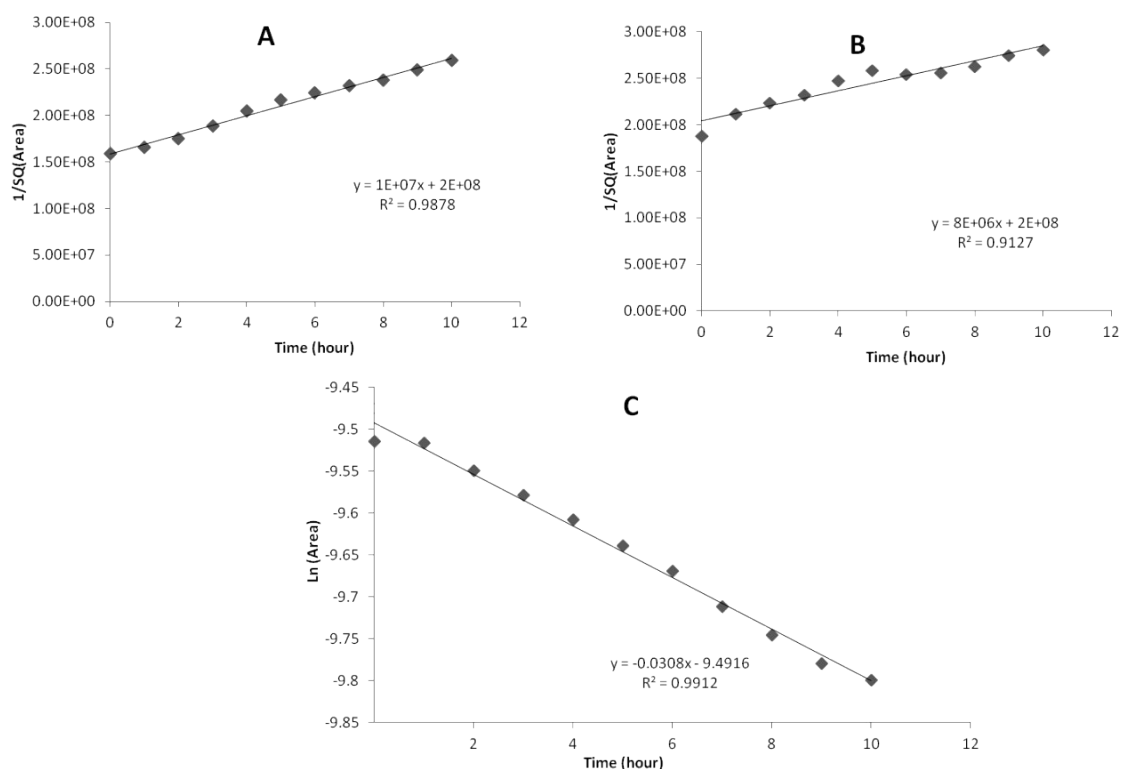

**Figure S-2.** Kinetic analysis of oxygen peak areas: (A) EC#11775, third order reaction fitting; (B) EC#25922, third order reaction fitting; (C) SE#12228, first order reaction fitting.

**Table S-1** Quality control criteria used for data analysis and database development

| Parameter                                                                 | Criteria                                                         | Rationale                                                   |
|---------------------------------------------------------------------------|------------------------------------------------------------------|-------------------------------------------------------------|
| The sum of squared error to the 6 <sup>th</sup> order polynomial equation | Reject a curve whose sum is higher than $10^{-6}$                | Rule out noisy curves                                       |
| Maximum delta current ( $\delta_i$ )                                      | Reject a curve with all $\delta_i$ lower than $10^{-5}$ A        | Rule out low flat curves which cannot be analyzed.          |
| Number of rejected DPV curve in a whole data set                          | Reject a data set contains more than three rejected DPV curves   | Rule out data sets have too many error cannot be classified |
| Initial oxygen peak value                                                 | Reject data sets with initial oxygen peak lower than $10^{-4}$ A | Rule out low initial oxygen samples                         |

**Table S-2** Features extraction. Thirty two features derived from the DPV measurements used in AMC<sup>3</sup>. Features 1 to 16 was based on oxygen peak area vs time curves; Features 17 to 32 were based on pathogen peak area vs. time curves.

| Feature number | Description of features                                                                                 |
|----------------|---------------------------------------------------------------------------------------------------------|
| Feature 1      | The oxygen peak area value of the initial point                                                         |
| Feature 2      | Variance of the whole oxygen peak area vs time curve                                                    |
| Feature 3      | The hour when the transition point occurred in the oxygen peak area vs time curve                       |
| Feature 4      | Variance of the flat region in the oxygen peak area vs time curve                                       |
| Feature 5      | Slope of linear regression, for oxygen peak area vs time curve                                          |
| Feature 6      | Intercept of linear regression, for oxygen peak area vs time curve                                      |
| Feature 7      | Standard error of linear regression, for oxygen peak area vs time curve                                 |
| Feature 8      | Polynomial coefficient of $x^2$ of 2 <sup>nd</sup> order polynomial, for oxygen peak area vs time curve |
| Feature 9      | Polynomial coefficient of $x$ of 2 <sup>nd</sup> order polynomial, for oxygen peak area vs time curve   |
| Feature 10     | Intercept of 2 <sup>nd</sup> order polynomial, for oxygen peak area vs time curve                       |
| Feature 11     | Standard error of 2 <sup>nd</sup> order polynomial, for oxygen peak area vs time curve                  |
| Feature 12     | Polynomial coefficient of $x^3$ of 3 <sup>rd</sup> order polynomial, for oxygen peak area vs time curve |
| Feature 13     | Polynomial coefficient of $x^2$ of 3 <sup>rd</sup> order polynomial, for oxygen peak area vs time curve |
| Feature 14     | Polynomial coefficient of $x$ of 3 <sup>rd</sup> order polynomial, for oxygen peak area vs time curve   |
| Feature 15     | Intercept of 3 <sup>rd</sup> order polynomial, for oxygen peak area vs time curve                       |
| Feature 16     | Standard error of 3 <sup>rd</sup> order polynomial, for oxygen peak area vs time curve                  |
| Feature 17     | The pathogen peak area value of the initial point                                                       |
| Feature 18     | Variance of the whole pathogen peak area vs time curve                                                  |
| Feature 19     | The hour when the transition point occurred in the pathogen peak area vs time curve                     |
| Feature 20     | Variance of the flat region in the pathogen peak area vs time curve                                     |
| Feature 21     | Slope of linear regression, for pathogen peak area vs time                                              |

|            | curve                                                                                                     |
|------------|-----------------------------------------------------------------------------------------------------------|
| Feature 22 | Intercept of linear regression, for pathogen peak area vs time curve                                      |
| Feature 23 | Standard error of linear regression, for pathogen peak area vs time curve                                 |
| Feature 24 | Polynomial coefficient of $x^2$ of 2 <sup>nd</sup> order polynomial, for pathogen peak area vs time curve |
| Feature 25 | Polynomial coefficient of $x$ of 2 <sup>nd</sup> order polynomial, for pathogen peak area vs time curve   |
| Feature 26 | Intercept of 2 <sup>nd</sup> order polynomial, for pathogen peak area vs time curve                       |
| Feature 27 | Standard error of 2 <sup>nd</sup> order polynomial, for pathogen peak area vs time curve                  |
| Feature 28 | Polynomial coefficient of $x^3$ of 3 <sup>rd</sup> order polynomial, for pathogen peak area vs time curve |
| Feature 29 | Polynomial coefficient of $x^2$ of 3 <sup>rd</sup> order polynomial, for pathogen peak area vs time curve |
| Feature 30 | Polynomial coefficient of $x$ of 3 <sup>rd</sup> order polynomial, for pathogen peak area vs time curve   |
| Feature 31 | Intercept of 3 <sup>rd</sup> order polynomial, for pathogen peak area vs time curve                       |
| Feature 32 | Standard error of 3 <sup>rd</sup> order polynomial, for pathogen peak area vs time curve                  |
